# Supplementary material for: Human amnion mesenchymal stem cells promote endometrial repair via paracrine, preferentially than transdifferentiation
Source: Springer Nature journal article supplement (doi:10.1186/s12964-024-01656-0), 2024-05-31
Supplement: MOESM1 [file 12964_2024_1656_MOESM1_ESM.pdf]

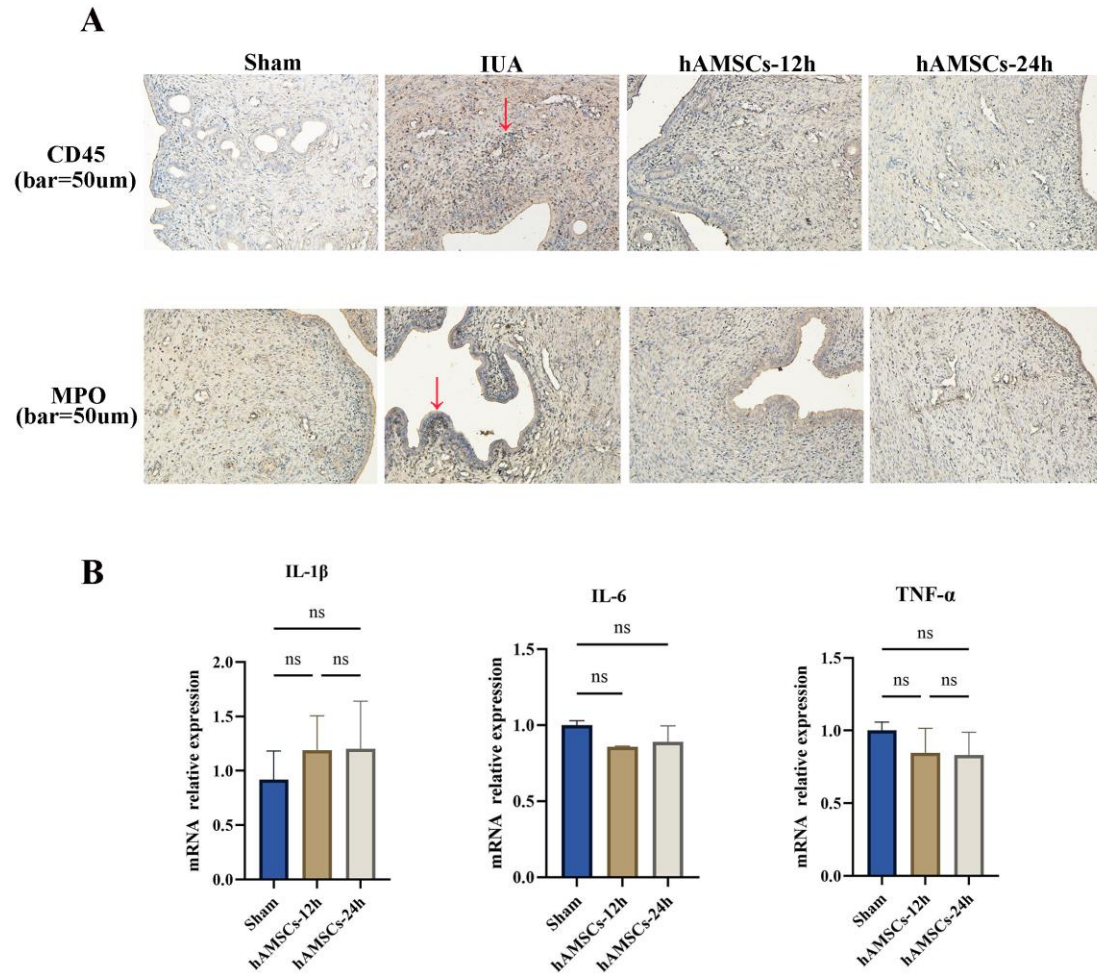

**Fig.S1** The expression of inflammation-related factors after injection of hAMSCs into uterus of SD rats. **(A)** IHC showed the expression of MPO and CD45 in the uterus (scale bar = 50um). **(B)** qPCR detected the expression of IL-1, IL-6, and TNF- $\alpha$ . Quantification results normalized to GAPDH are shown as mean  $\pm$  SD (n = 3), a one-way ANOVA test. Ns indicates no significance.
